# Supplementary material for: Entropy modulation strategy of P2-type layered transition metal oxide cathodes for sodium-ion batteries with a high performance
Source: Royal Society of Chemistry journal article supplement (doi:10.1039/d3ta04094a), 2023-01-01
Supplement: d3ta04094a1.pdf [file d3ta04094a1.pdf]

## Supplementary Material

### Entropy modulation strategy of P2-type layered transition-metal oxide cathodes for sodium-ion batteries with a high performance

Yusong Wang,<sup>a</sup> Yingshuai Wang,<sup>a</sup> Yuhang Xing,<sup>a</sup> Chunyu Jiang,<sup>a</sup> Yanfei Pang,<sup>a</sup> Hongfeng Liu,<sup>a</sup> Feng Wu,<sup>a</sup> Hongcai Gao<sup>a,b,c,\*</sup>

<sup>a</sup> School of Materials Science and Engineering, Beijing Institute of Technology, Beijing 100081, P.R. China

<sup>b</sup> Yangtze Delta Region Academy of Beijing Institute of Technology, Jiaxing, 314019, China

<sup>c</sup> Beijing Institute of Technology Chongqing Innovation Center, Chongqing 401120, P.R. China

\*Corresponding author: [gaohc@bit.edu.cn](mailto:gaohc@bit.edu.cn) (Prof. Hongcai Gao)

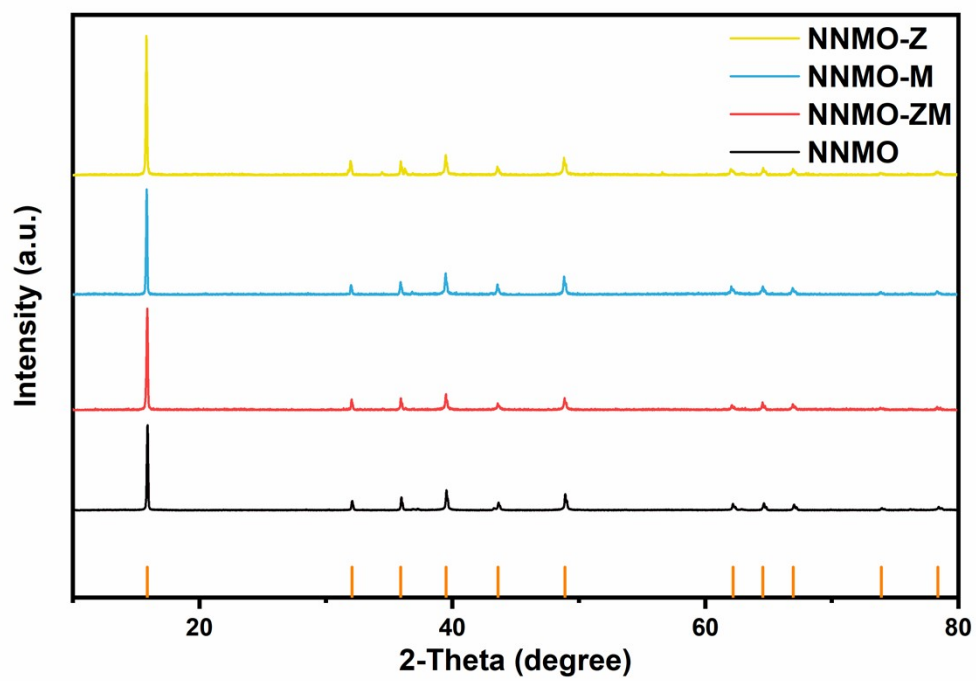

Fig. S1: Powder XRD patterns of NNMO-ZM, NNMO-M, NNMO-Z and NNMO.

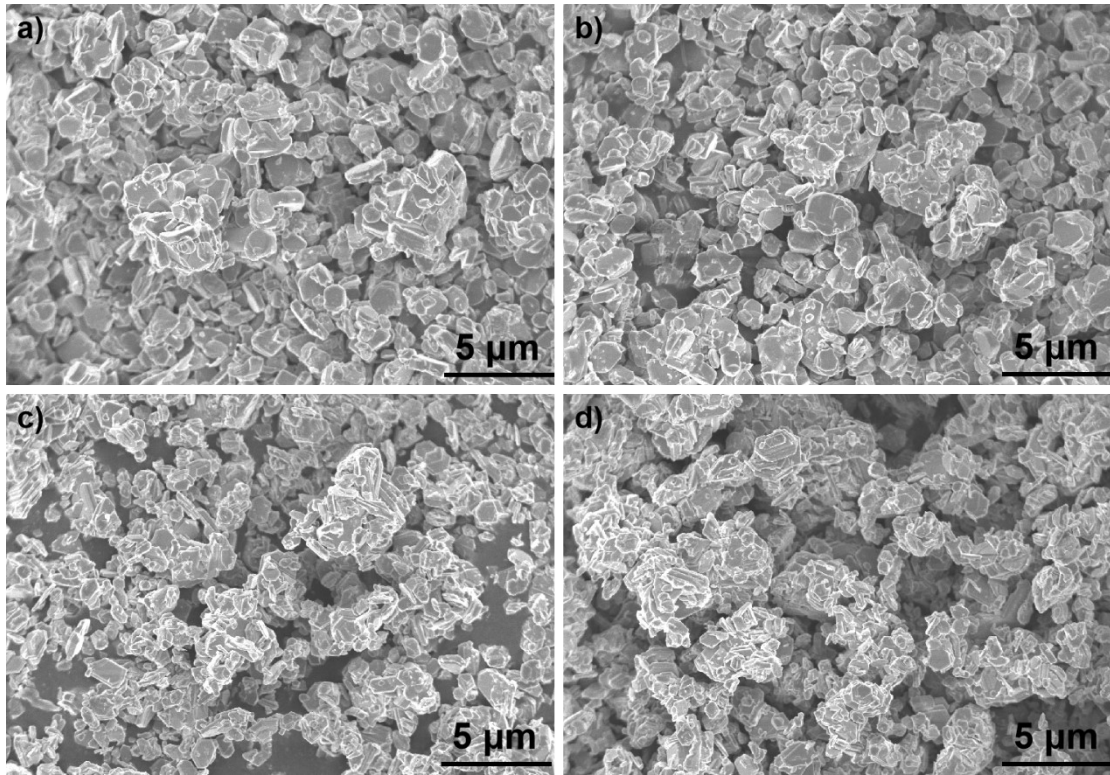

**Fig. S2:** SEM images of four samples. (a) NNMO-ZM; (b) NNMO-M; (c) NNMO-Z; (d) NNMO.

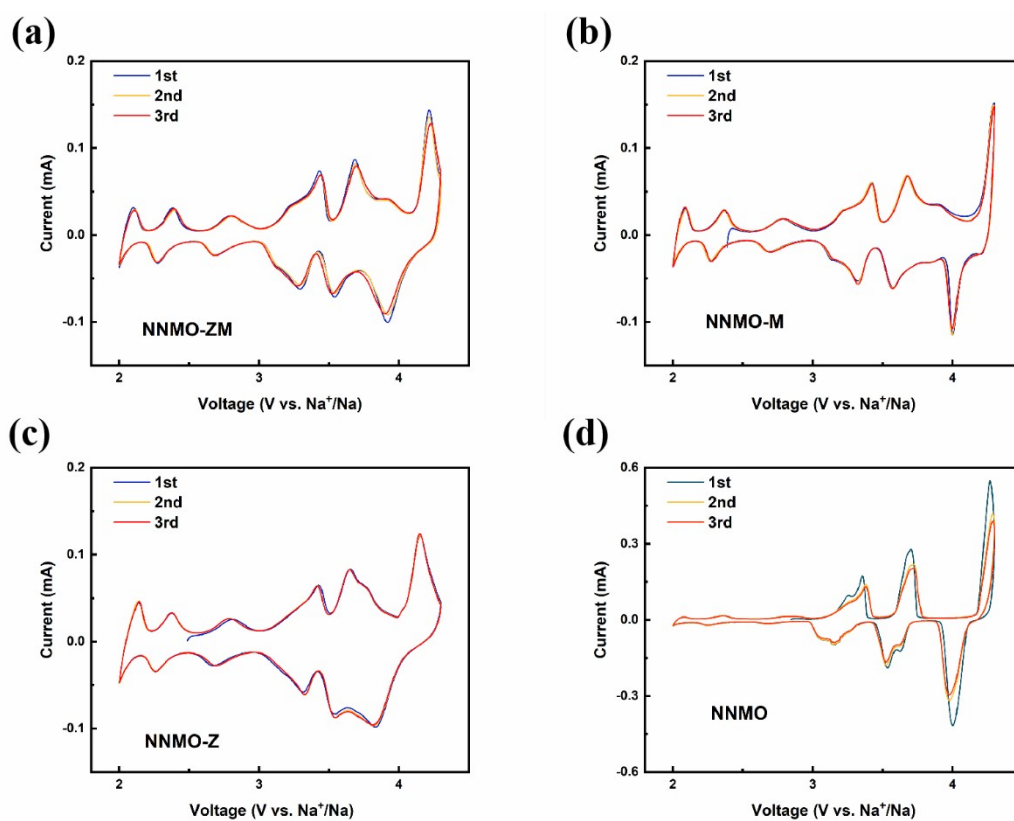

**Fig. S3:** CV curves of (a) NNMO-ZM , (b) NNMO-M , (c) NNMO-Z and (d) NNMO electrodes between 2.0 and 4.3 V at  $0.1 \text{ mV s}^{-1}$  scan rate.

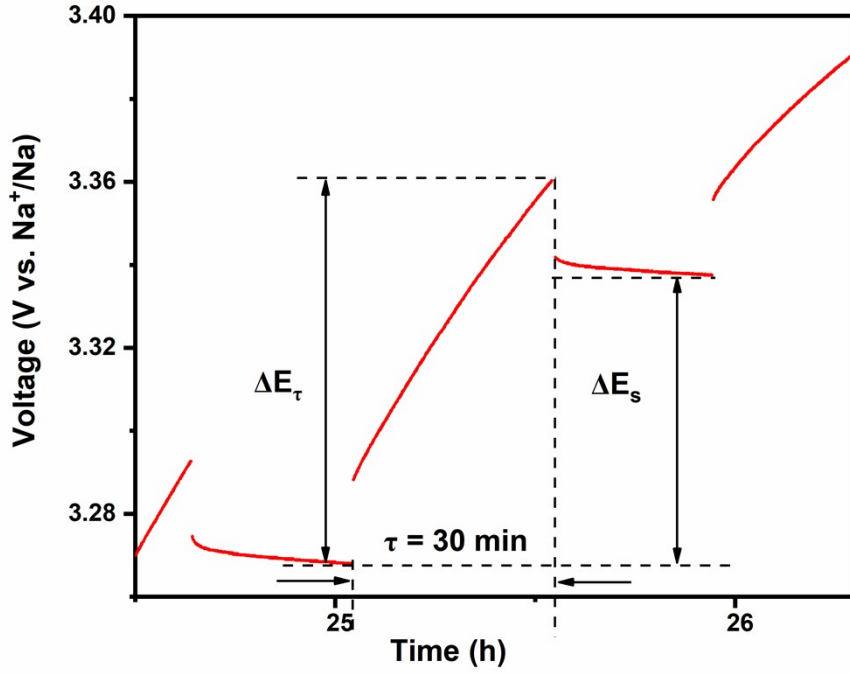

**Fig. S4:** Schematic illustration of selected steps of GITT test for NNMO-ZM with a charge/discharge time of 30 min.

Based on the GITT measurement, the  $\text{Na}^+$  diffusion coefficient can be calculated by Equation S1:

$$D_{\text{Na}^+} = \frac{4}{\pi\tau} \left( \frac{m_B V_M}{M_B S} \right)^2 \left[ \frac{\Delta E_s}{\Delta E_t} \right]^2 \quad \text{S1}$$

where  $D_{\text{Na}^+}$  ( $\text{cm}^2 \text{s}^{-1}$ ) represents the  $\text{Na}^+$  diffusion coefficient,  $V_M$  ( $\text{cm}^3 \text{mol}^{-1}$ ),  $m_B$ , and  $M_B$  are the molar volume, weight, and molar weight of the active materials, respectively,  $S$  and  $\tau$ (s) denote the surface area of the electrode and the testing time in each step, and  $\Delta E_s$  and  $\Delta E_t$  are the quasi-equilibrium potential and the change in cell voltage  $E$  during the current pulse, respectively.<sup>1-4</sup>

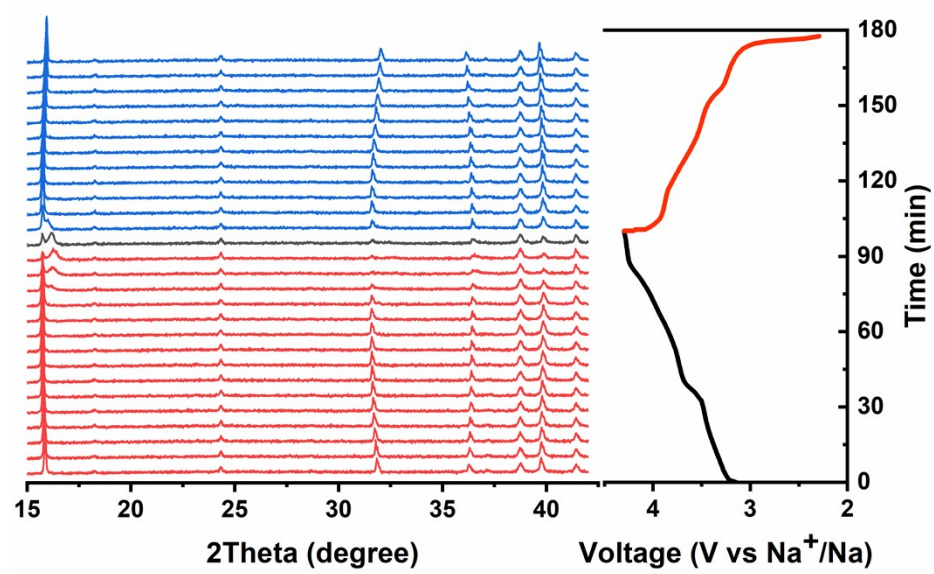

Fig. S5: Contour maps of in situ XRD patterns from NNMO-ZM.

**Table S1:** Summary of refined structural parameters of  $\text{Na}_{0.67}\text{Mn}_{0.67}\text{Ni}_{0.21}\text{Mg}_{0.12-x}\text{Zn}_x\text{O}_2$ 

| sample  | a[Å]    | c[Å]     | V[Å <sup>3</sup> ] | Rwp(%) | Rp(%) | GOF  |
|---------|---------|----------|--------------------|--------|-------|------|
| NNMO-ZM | 2.88348 | 11.19062 | 80.578             | 4.43   | 2.88  | 1.41 |
| NNMO-M  | 2.88312 | 11.18777 | 80.537             | 5.505  | 3.72  | 1.57 |
| NNMO-Z  | 2.88285 | 11.18284 | 80.420             | 5.056  | 3.93  | 1.48 |
| NNMO    | 2.88278 | 11.15952 | 80.316             | 4.609  | 3.61  | 1.64 |

**Table S2:** Crystallographic parameters of NNMO-ZM refined by the Rietveld method.

| Space group P63/mmc |                     |                      |                    |         |       |                  |
|---------------------|---------------------|----------------------|--------------------|---------|-------|------------------|
| Lattice             | a[Å]                | c[Å]                 | V[Å <sup>3</sup> ] | Rwp(%)  | Rp(%) | GOF              |
| Hexagonal           | 2.8835<br>(±0.0002) | 11.1906<br>(±0.0009) | 80.58<br>(±0.01)   | 5.489   | 3.69  | 1.41             |
| Atom                | Site                | x                    | y                  | z       | Occ.  | U <sub>iso</sub> |
| Na <sub>c</sub>     | 2d                  | 0.6667               | 0.3333             | 0.25    | 0.425 | 0.43552          |
| Na <sub>f</sub>     | 2b                  | 0                    | 0                  | 0.25    | 0.286 | 0.12242          |
| Mn                  | 2a                  | 0                    | 0                  | 0       | 0.667 | 0                |
| O                   | 4f                  | 0.6667               | 0.3333             | 0.07645 | 0.975 | 0.03096          |
| Ni                  | 2a                  | 0                    | 0                  | 0       | 0.213 | 0                |
| Zn                  | 2a                  | 0                    | 0                  | 0       | 0.06  | 0                |
| Mg                  | 2a                  | 0                    | 0                  | 0       | 0.06  | 0                |



**Table S3:** The result of Mn2p<sub>3/2</sub> multiple splitting peaks from NNMO-ZM.

| Mn2p <sub>3/2</sub> (Multiple splitting peaks) |                   |                |                  |                  |                  |
|------------------------------------------------|-------------------|----------------|------------------|------------------|------------------|
| Peak                                           | Binding energy/eV | Chemical state | Atomic percent % | Atomic percent % | Atomic percent % |
| Mn2p <sub>3/2</sub>                            | 641.8             |                | 38.07            |                  |                  |
| Mn2p <sub>3/2</sub>                            | 642.66            |                | 24.38            |                  |                  |
| Mn2p <sub>3/2</sub>                            | 643.36            |                | 14.11            |                  |                  |
| Mn2p <sub>3/2</sub>                            | 644.11            | Mn(IV)         | 8.39             | 91.82            | 100              |
| Mn2p <sub>3/2</sub>                            | 644.96            |                | 4.58             |                  |                  |
| Mn2p <sub>3/2</sub>                            | 645.96            |                | 2.29             |                  |                  |
| Mn2p <sub>3/2</sub>                            | 641.23            | Mn(III)        | 8.18             | 8.18             |                  |

## Reference

1. Y. Wang, Q. Wang, X. Ding, M. Wang, Y. Xin and H. Gao, *Applied Surface Science*, 2022, **601**, 154218.
2. Q. Wang, X. Ding, J. Li, H. Jin and H. Gao, *Chemical Engineering Journal*, 2022, **448**, 137740.
3. M. Wang, Q. Wang, X. Ding, Y. Wang, Y. Xin, P. Singh, F. Wu and H. Gao, *Interdisciplinary Materials*, 2022, **1**, 373-395.
4. Q. Wang, C. Ling, J. Li, H. Gao, Z. Wang and H. Jin, *Chemical Engineering Journal*, 2021, **425**, 130680.
